# Supplementary material for: Uncovering Scientist Stereotypes and Their Relationships with Student Race and Student Success in a Diverse, Community College Setting
Source: Atypon-hosted journal article supplement (doi:10.1187/cbe.14-12-0231), 2015-09-01
Supplement: combinedsupmats.pdf [file combinedsupmats.pdf]

# Supplemental Material

*CBE—Life Sciences Education*

Schinske *et al.*

**Student Comments Included In the “Positive Stereotype” Category Including Their Frequencies, & Representative Student Quotes. (“Positive Stereotype” refers to a category previously described in Mead and Metraux, 1957. See Introduction and Methods for details.)**

| <b>Description</b>         | <b>Category</b> | <b>Subcategory</b>  | <b>n</b> | <b>Representative Student Quote</b>                                                                                                                                                                                                                                                                                                   |
|----------------------------|-----------------|---------------------|----------|---------------------------------------------------------------------------------------------------------------------------------------------------------------------------------------------------------------------------------------------------------------------------------------------------------------------------------------|
| Curious                    | Stereotype      | Positive Stereotype | 42       | <p>“I believe people that do science are very curious and they want to understand the questions of the world.”</p> <p>“I think the type of people that do science are ones that enjoy striving for learning the unknown and have a sense of curiosity.”</p> <p>“I think people that do science are very curious about the world.”</p> |
| Interested in Work         | Stereotype      | Positive Stereotype | 31       | <p>“People who are interested in the subject and who enjoy researching new information...”</p> <p>“Scientist do science, or anyone that is interested in learning and gaining knowledge can do science...”</p>                                                                                                                        |
| Intelligent                | Stereotype      | Positive Stereotype | 25       | <p>“Scientist are very smart people and I think they have high IQs”</p> <p>“[Scientists] are all smart people.”</p>                                                                                                                                                                                                                   |
| Works to Make World Better | Stereotype      | Positive Stereotype | 19       | <p>“[Scientists] also usually have a desire to improve the human [and] world conditions to the best of their abilities.”</p> <p>“The types of people that do science want to [...] better the world.”</p>                                                                                                                             |
| Passionate                 | Stereotype      | Positive Stereotype | 18       | <p>“The types of people who do science are those individuals who are passionate about knowing...living things”</p> <p>“Generally people that do science are ones who...have a passion for discovery.”</p> <p>“I find most scientists are also passionate about their work...”</p>                                                     |
| Wish to Discover Something | Stereotype      | Positive Stereotype | 13       | <p>“I see those who ‘do’ science are progressive and forward-thinking. They make new, revolutionary findings.”</p> <p>“There are people who become scientist because they...do it to help discover new things.”</p>                                                                                                                   |
| Do Lab Work/Experiments    | Stereotype      | Positive Stereotype | 11       | <p>“Scientist are people who really like experiments...”</p> <p>“Experimenting with things allows them to figure stuff out.”</p>                                                                                                                                                                                                      |
| Dedicated                  | Stereotype      | Positive Stereotype | 10       | <p>“Also, the scientist has...dedication.”</p> <p>“[Darwin] was interested and dedicated to what he was doing.”</p> <p>“People that do science for a living are often dedicated.”</p>                                                                                                                                                 |

| <b>Description</b>   | <b>Category</b> | <b>Subcategory</b>  | <b>n</b> | <b>Representative Student Quote</b>                                                                                                                                                                                                     |
|----------------------|-----------------|---------------------|----------|-----------------------------------------------------------------------------------------------------------------------------------------------------------------------------------------------------------------------------------------|
| Patient              | Stereotype      | Positive Stereotype | 9        | “The types of people that do science are patient.”<br>“[Scientists] can, however, be anyone that has the patience and temperament for research and documentation.”                                                                      |
| Innovative           | Stereotype      | Positive Stereotype | 9        | “I see those who ‘do’ science are progressive and forward-thinking. They make new, revolutionary findings that could break away from traditional beliefs.”<br>“The types of people that do science are innovative, observative people.” |
| Good at Subject      | Stereotype      | Positive Stereotype | 8        | “People who are also good at science and excel in math tend to be scientist...”<br>“People that do science are smart people and really into science.”                                                                                   |
| Creative             | Stereotype      | Positive Stereotype | 5        | “They are creative and willing to take a risk and ready for challenges. They are creative critical thinkers.”<br>“These people are “out of the box” thinkers! Creative, yet realistic.”                                                 |
| Study Hard           | Stereotype      | Positive Stereotype | 5        | “Types of people who practice science are usually hard working, knowledgeable individuals who have a specific scientific goal.”<br>“Scientists study science-related subjects...love studying their subject matter.”                    |
| Investigate Things   | Stereotype      | Positive Stereotype | 4        | “Anyone who investigates the natural world, people who want to discover new worlds, people who ask questions: ‘why’ or ‘how’”                                                                                                           |
| Open Minded          | Stereotype      | Positive Stereotype | 4        | “People that study and do science are usually open minded, patient and smart.”                                                                                                                                                          |
| Do Scientific Method | Stereotype      | Positive Stereotype | 4        | “The people who do science hypothesis, observe, and test.”<br>There are many different types of scientist. For example, there scientist who study blood...There are also those who do experiments find the cure for diseases.”          |

| <b>Description</b>           | <b>Category</b> | <b>Subcategory</b>  | <b>n</b> | <b>Representative Student Quote</b>                                                                                                                                                                                                                                                                         |
|------------------------------|-----------------|---------------------|----------|-------------------------------------------------------------------------------------------------------------------------------------------------------------------------------------------------------------------------------------------------------------------------------------------------------------|
| Objective                    | Stereotype      | Positive Stereotype | 2        | “The types of people that do science are innovative, observative people... Objectivity is key to a properly executed experiment as well.”<br>“Many different people can do science. If one is curious and objective, they can observe certain phenomena and interpret it in a factual, opinionated manner.” |
| Have Extensive Training      | Stereotype      | Positive Stereotype | 2        | “Scientists have PhDs.”                                                                                                                                                                                                                                                                                     |
| Enjoy Learning               | Stereotype      | Positive Stereotype | 2        | “People that do science are people that enjoy learning new things about the world on a regular basis.”                                                                                                                                                                                                      |
| Willing to Make Mistakes     | Stereotype      | Positive Stereotype | 2        | “They make mistakes, but a good scientist accepts that and tries to figure out why and how to proceed form there.”                                                                                                                                                                                          |
| Critical Thinkers            | Stereotype      | Positive Stereotype | 1        | “They are creative critical thinkers.”                                                                                                                                                                                                                                                                      |
| Focused/Attentive            | Stereotype      | Positive Stereotype | 1        | “Like to focus on something.”                                                                                                                                                                                                                                                                               |
| Challenge Selves             | Stereotype      | Positive Stereotype | 1        | “...willing to take risks and ready for challenges.”                                                                                                                                                                                                                                                        |
| Realistic                    | Stereotype      | Positive Stereotype | 1        | “Creative yet realistic.”                                                                                                                                                                                                                                                                                   |
| Reject Ideas                 | Stereotype      | Positive Stereotype | 1        | “Scientist often have a tendency to reject an idea until it becomes a pattern.”                                                                                                                                                                                                                             |
| Strong Conviction            | Stereotype      | Positive Stereotype | 1        | “Scientist always share one thing, a deep compassion and strong conviction to what they do.”                                                                                                                                                                                                                |
| Make Leaps in Knowledge      | Stereotype      | Positive Stereotype | 1        | “The types of people that do science are curious because they dare to know outcomes. They are those who want to take leaps...They are the ones jumping to be first to research something mysterious...”                                                                                                     |
| Work On Technology           | Stereotype      | Positive Stereotype | 1        | “Most scientists conduct research to help improve technology in human health...”                                                                                                                                                                                                                            |
| Think Differently            | Stereotype      | Positive Stereotype | 1        | “In my opinion, the type of people that do science are always having curiosities about many things and think in different ways compared to the others.”                                                                                                                                                     |
| Wanted to Become a Scientist | Stereotype      | Positive Stereotype | 1        | “The types of people that do science...wanted to become a scientist.”                                                                                                                                                                                                                                       |

| <b>Description</b> | <b>Category</b> | <b>Subcategory</b>  | <b>n</b> | <b>Representative Student Quote</b>                  |
|--------------------|-----------------|---------------------|----------|------------------------------------------------------|
| Wonder/Think ahead | Stereotype      | Positive Stereotype | 1        | "A scientist needs to wonder, needs to think ahead." |

**Student Comments Included In the “Negative Stereotype” Category Including Their Frequencies, & Representative Student Quotes. (“Negative Stereotype” refers to a category previously described in Mead and Metraux, 1957. See Introduction and Methods for details.)**

| <b>Description</b>            | <b>Category</b> | <b>Subcategory</b>  | <b>n</b> | <b>Representative Student Quote</b>                                                                                                                                                                                                      |
|-------------------------------|-----------------|---------------------|----------|------------------------------------------------------------------------------------------------------------------------------------------------------------------------------------------------------------------------------------------|
| Asocial                       | Stereotype      | Negative Stereotype | 7        | “The types of people that do science are very introverted.”<br>“The types of people that do science are usually nerds.”                                                                                                                  |
| Mad/Crazy                     | Stereotype      | Negative Stereotype | 5        | “The types of people who do science are...the crazy ones, hence the ‘Mad Scientist.’”<br>“I heard that scientists are sometimes abnormal in the way they think...all scientists are extreme.”                                            |
| Always Reading Books          | Stereotype      | Negative Stereotype | 3        | “[Scientists] are always reading.”<br>“The types of people that do science are always reading.”                                                                                                                                          |
| Always Working In Lab Indoors | Stereotype      | Negative Stereotype | 3        | “[Scientists] are always in their lab and do their experiments and taking notes while they’re doing it.”<br>“People who do science are working in a clean, white, and big building in which there’s gas blowing and wear white clothes.” |
| Strange/Weird                 | Stereotype      | Negative Stereotype | 2        | “Sometimes [scientists] can be seen in ‘weird’ people.”<br>“For me, [scientists are] kinda strange.”                                                                                                                                     |
| Boring                        | Stereotype      | Negative Stereotype | 1        | “The types of who do science are the the boring ones.”                                                                                                                                                                                   |
| Overly Involved In Work       | Stereotype      | Negative Stereotype | 1        | “The types of people that do science...obsess over their work.”                                                                                                                                                                          |

**Student Comments Included In the “Stereotypical Scientist” Category Including Their Frequencies, & Representative Student Quotes. (“Stereotypical Scientist” refers to scientists described in Dikmenli, 2010. See Introduction and Methods for details.)**

| <b>Description</b> | <b>Category</b> | <b>Subcategory</b>      | <b>n</b> | <b>Representative Student Quote</b>                                                                                                                                                                                                                                                                     |
|--------------------|-----------------|-------------------------|----------|---------------------------------------------------------------------------------------------------------------------------------------------------------------------------------------------------------------------------------------------------------------------------------------------------------|
| Albert Einstein    | Stereotype      | Stereotypical Scientist | 23       | “For example, Einstein was a very curious person in physics...”<br>“One scientist that comes to my mind is Albert Einstein.”<br>“People who are also good at science and excel in math tend to be scientist, like Albert Einstein.”                                                                     |
| Isaac Newton       | Stereotype      | Stereotypical Scientist | 6        | “Like Isaac Newton had to be curious so that he can observed gravity from a fallen apple.”<br>“Newton is a good example. He established his three laws and founded calculus. He is the father of calculus.”<br>“I know of Sir Isaac Newton who basically described to us the three laws of motion.”     |
| Charles Darwin     | Stereotype      | Stereotypical Scientist | 4        | “Well, I guess the most scientist I’m familiar with is Darwin, and his studies on Natural Selection.”<br>“Some scientist I know of are Charles Darwin...”                                                                                                                                               |
| Sigmund Freud      | Stereotype      | Stereotypical Scientist | 4        | “Sigmund Freud may have not had scientifically correct theories; he got a lot of people interested in the brain.”<br>“A specific scientist is Sigmund Freud. Not all his theories were accepted by society but he enjoys challenging things that he does not understand and see how they come to live.” |
| Thomas Edison      | Stereotype      | Stereotypical Scientist | 2        | “For example, the inventor of [the light bulb] Edison. He failed his experiment over a thousand time but he didn’t give up.”<br>“Einstein, Edison, Tesla, Freud. The types of who do science want to satisfy their curiosity...”                                                                        |
| Benjamin Franklin  | Stereotype      | Stereotypical Scientist | 1        | “Next to some of the greatest like Benjamin Franklin.”                                                                                                                                                                                                                                                  |
| Leonardo da Vinci  | Stereotype      | Stereotypical Scientist | 1        | “Some examples would be Leo Da Vince...”                                                                                                                                                                                                                                                                |
| Galileo Galilei    | Stereotype      | Stereotypical Scientist | 1        | “The only scientist I can think of at the moment is Galileo, the man that studied the stars and the Earth by using science and proved the churches wrong.”                                                                                                                                              |

| Description  | Category   | Subcategory             | n | Representative Student Quote               |
|--------------|------------|-------------------------|---|--------------------------------------------|
| James Watson | Stereotype | Stereotypical Scientist | 1 | "James Watson used the scientific method." |

**Student Comments Included In the "Nonstereotype Description" Category Including Their Frequencies, & Representative Student Quotes. ("Nonstereotype Description" refers to scientist descriptions observed in the present study, but not in Mead and Metraux, 1957. See Introduction and Methods for details.)**

| Description                     | Category      | Subcategory               | n | Representative Student Quote                                                                                                                                                                                                                                                                            |
|---------------------------------|---------------|---------------------------|---|---------------------------------------------------------------------------------------------------------------------------------------------------------------------------------------------------------------------------------------------------------------------------------------------------------|
| Any Type of Person              | Nonstereotype | Nonstereotype Description | 9 | "Anyone that is interested in learning and gaining knowledge can do science, it's not limited to any types of people."<br>"While I believe anyone with enough hard work and perseverance anyone can be competent in the field of science, I do believe some people are naturally drawn to the subject." |
| Good Observers                  | Nonstereotype | Nonstereotype Description | 4 | "The types of people that do science are innovative, observative people."<br>"[Scientists] are hardworking, because they need to keep a close eye on experiments/observations."                                                                                                                         |
| Analytical                      | Nonstereotype | Nonstereotype Description | 3 | "[Scientists] are usually very logical thinkers who can figure things out on their own."<br>"[Scientists] are able to focus and think critically for long periods of time."                                                                                                                             |
| Detail Oriented                 | Nonstereotype | Nonstereotype Description | 3 | "I think the people who do science have to be patient, detail-oriented..."<br>"These people are...very careful, detail-oriented individuals!"                                                                                                                                                           |
| Good Communicators              | Nonstereotype | Nonstereotype Description | 2 | "The people who they do science...can communicate to each other and share."                                                                                                                                                                                                                             |
| Fact-Based People               | Nonstereotype | Nonstereotype Description | 2 | "Scientists tend to be more fact based people."<br>"People do science based on facts."                                                                                                                                                                                                                  |
| Imaginative                     | Nonstereotype | Nonstereotype Description | 2 | "One scientist that comes to mind is Albert Einstein. He was very creative and imaginative."                                                                                                                                                                                                            |
| Knowledgeable of Current Events | Nonstereotype | Nonstereotype Description | 2 | "[Scientists] typically are up to date w/all the news..."<br>"These individuals have an interest in a field that's constantly changing so they probably are always learning to keep up with new information."                                                                                           |



| <b>Description</b>                             | <b>Category</b> | <b>Subcategory</b>        | <b>n</b> | <b>Representative Student Quote</b>                                                                                                                                                                                                                                                                                                        |
|------------------------------------------------|-----------------|---------------------------|----------|--------------------------------------------------------------------------------------------------------------------------------------------------------------------------------------------------------------------------------------------------------------------------------------------------------------------------------------------|
| Share Ideas                                    | Nonstereotype   | Nonstereotype Description | 2        | "[Scientists] like to share ideas to better understand themselves."<br>"The people who do science, they can communicate to each other and share."                                                                                                                                                                                          |
| Go Against Stereotypes                         | Nonstereotype   | Nonstereotype Description | 2        | "I do somehow see a pattern, people expect successful scientist to be male and expect them to have been geniuses since they were in diapers. I, however, have recently notice that a lot of women have been important to science."<br>"[Albert Einstein] shows that you don't need to be a total book worm to make an impact on the world" |
| Enthusiastic                                   | Nonstereotype   | Nonstereotype Description | 2        | "Bill Nye and Neil Degrasse Tyson are two great examples they are always so excited and enthusiastic about the universe and science as a whole."                                                                                                                                                                                           |
| Interested In Many Subjects                    | Nonstereotype   | Nonstereotype Description | 1        | "Albert was a outdoorsy person and showed interest in other subjects rather than science."                                                                                                                                                                                                                                                 |
| Interesting                                    | Nonstereotype   | Nonstereotype Description | 1        | "Science are usually interesting to talk to because they are interested in many things and also know a lot of cool things."                                                                                                                                                                                                                |
| Caring                                         | Nonstereotype   | Nonstereotype Description | 1        | "Mostly all people who like to work with other people or have a caring/motherly characteristic to them."                                                                                                                                                                                                                                   |
| Compassionate                                  | Nonstereotype   | Nonstereotype Description | 1        | "Scientist always share one thing. A deep compassion..."                                                                                                                                                                                                                                                                                   |
| Contribute In Many Ways (not just experiments) | Nonstereotype   | Nonstereotype Description | 1        | "The types of scientist show that there are different ways to contribute to science, not just experiment."                                                                                                                                                                                                                                 |
| Resourceful                                    | Nonstereotype   | Nonstereotype Description | 1        | "They have big resources or knowledge."                                                                                                                                                                                                                                                                                                    |
| Have a Scientific Goal                         | Nonstereotype   | Nonstereotype Description | 1        | "Types of people who practice science are usually hard working, knowledgeable individuals who have a specific scientific goal."                                                                                                                                                                                                            |
| Have Integrity                                 | Nonstereotype   | Nonstereotype Description | 1        | "Scientist includes life skills such as perseverance, effort, initiative, even sometimes integrity."                                                                                                                                                                                                                                       |
| Organized                                      | Nonstereotype   | Nonstereotype Description | 1        | "They are able to be confused and think critically for long periods of time, and can keep organized..."                                                                                                                                                                                                                                    |
| Outdoorsy                                      | Nonstereotype   | Nonstereotype Description | 1        | "Albert was a outdoorsy person..."                                                                                                                                                                                                                                                                                                         |

| <b>Description</b>                | <b>Category</b> | <b>Subcategory</b>        | <b>n</b> | <b>Representative Student Quote</b>                                                                                                         |
|-----------------------------------|-----------------|---------------------------|----------|---------------------------------------------------------------------------------------------------------------------------------------------|
| Like To Work With Others          | Nonstereotype   | Nonstereotype Description | 1        | "Mostly all people who like to work with people.."                                                                                          |
| Travel                            | Nonstereotype   | Nonstereotype Description | 1        | "They read a lot about their subjects, and travel a lot to study it."                                                                       |
| Invest Whole Selves/Souls In Work | Nonstereotype   | Nonstereotype Description | 1        | "The types of people that do science is everyone. Since is something done on a daily basis with yourself within your body, mind, and soul." |
| Risk Takers                       | Nonstereotype   | Nonstereotype Description | 1        | "...willing to take risk and ready for challenges."                                                                                         |

**Student Comments Included In the “Nonstereotypical Scientist” Category Including Their Frequencies, & Representative Student Quotes. (“Nonstereotypical Scientist” refers to specific examples of scientists observed in the present study, but not in Dikmenli, 2010. See Introduction and Methods for details.)**

| <b>Description</b>                        | <b>Category</b> | <b>Subcategory</b>         | <b>n</b> | <b>Representative Student Quote</b>                                                                                                                                                                                                                                                            |
|-------------------------------------------|-----------------|----------------------------|----------|------------------------------------------------------------------------------------------------------------------------------------------------------------------------------------------------------------------------------------------------------------------------------------------------|
| Bill Nye                                  | Nonstereotype   | Nonstereotypical Scientist | 5        | “People like Bill Nye the Science Guy [do science].”<br>“Bill Nye and Neil Degrasse Tyson are two great examples.”<br>“I don’t know many scientists but I know Bill Nye...which both seem like they know a lot about things.”<br>“Bill Nye the Science Guy is the only real scientist I know.” |
| Mention Scientist Family Member or Friend | Nonstereotype   | Nonstereotypical Scientist | 2        | “My ex-girlfriend is a marine biologist, and she would happily recount her day of paperwork testing and more testing. “<br>“I do not remember any exact names of scientists, but I know one friend who studies to be a doctor.”                                                                |
| Marie Curie                               | Nonstereotype   | Nonstereotypical Scientist | 2        | “[Scientists] can be women, (Marie Curie) or they can be drop outs (Albert Einstein).”<br>“The specific scientists that I know are Newton and Marie Curry.”                                                                                                                                    |
| Nikola Tesla                              | Nonstereotype   | Nonstereotypical Scientist | 2        | “Einstein, Edison, Telsa, Freud.”<br>“Some examples would Leonardo Da-Vinci, Albert Einstein, Nikola Telsa, and Gauss.”                                                                                                                                                                        |
| Thomas Armstrong                          | Nonstereotype   | Nonstereotypical Scientist | 2        | “For example, Einstein...did well doing science and also in fact, Thomas Armstrong.”<br>“Thomas Armstrong talks about how the brain is like an ecosystem not a machine.”                                                                                                                       |
| Neil Degrasse Tyson                       | Nonstereotype   | Nonstereotypical Scientist | 2        | “Neil Degrasse Tyson studies is an astrophysicist that studies the universe.”<br>“Bill Nye and Neil Degrasse Tyson are two great examples because they are always so excited and enthusiastic about the universe and science as a whole.”                                                      |
| Brian Greene                              | Nonstereotype   | Nonstereotypical Scientist | 1        | “I know Brian Greene, a physicist who rallies for string theory.”                                                                                                                                                                                                                              |
| Dana Nakase                               | Nonstereotype   | Nonstereotypical Scientist | 1        | “I don’t have anyone in mind perhaps Jane Gooddall and Dana Nakase who loves marine biology.”                                                                                                                                                                                                  |

| <b>Description</b>     | <b>Category</b> | <b>Subcategory</b>         | <b>n</b> | <b>Representative Student Quote</b>                                                                                                                                                                                                                                                                |
|------------------------|-----------------|----------------------------|----------|----------------------------------------------------------------------------------------------------------------------------------------------------------------------------------------------------------------------------------------------------------------------------------------------------|
| Jane Goodall           | Nonstereotype   | Nonstereotypical Scientist | 1        | "I don't have anyone in mind perhaps Jane Goodall and Dana Nakase who loves marine biology."                                                                                                                                                                                                       |
| Mythbusters Scientists | Nonstereotype   | Nonstereotypical Scientist | 1        | "I don't know many scientists but I know Bill Nye and the Mythbusters which both seem like they know a lot about things I am familiar..."                                                                                                                                                          |
| People On TED Talks    | Nonstereotype   | Nonstereotypical Scientist | 1        | "I think of this TED talk I watched in which a doctor talked about how 3D printing can be used to create organs and how his drive/passion came from wanting to help people."                                                                                                                       |
| People On YouTube      | Nonstereotype   | Nonstereotypical Scientist | 1        | "They types of scientist I am most aware of, or stand out the most, that are still alive are generally very enthusiastic and inquisitive people. People like Bill Nye the Science Guy, and YouTubers (such as minuteearth, vsauce, etc.) show a high level of enthusiasm and love for their jobs." |
| Carl Jung              | Nonstereotype   | Nonstereotypical Scientist | 1        | "Psychologist: Freud, Calr Jung, ..."                                                                                                                                                                                                                                                              |
| Carl Gauss             | Nonstereotype   | Nonstereotypical Scientist | 1        | "Some examples would be Leornado Da-Vinci, Albert Eistein, Nikola Telsa, and Gauss."                                                                                                                                                                                                               |
| Abraham Maslow         | Nonstereotype   | Nonstereotypical Scientist | 1        | "Pychologist: Freud, Carl Jung...Maslow."                                                                                                                                                                                                                                                          |
| Ivan Pavlov            | Nonstereotype   | Nonstereotypical Scientist | 1        | "I have learned a bit about Pavlov and his dogs, technically he is a psychologist, but it's basically the same field."                                                                                                                                                                             |
| Viktor Frankl          | Nonstereotype   | Nonstereotypical Scientist | 1        | "Psychologist: Freud, Carl Jung, Viktor Frank, Maslow."                                                                                                                                                                                                                                            |
| Zimmerman              | Nonstereotype   | Nonstereotypical Scientist | 1        | "I also learned about (I think his name was Zimmerman or something of that sort) and his study of how the clothes you wear and the situation you are put in changes and shapes your actions."                                                                                                      |

**Student Comments Included In the “Field of Science” Category Including Their Frequencies.**

| <b>Description</b>      | <b>Category</b>  | <b>n</b> |
|-------------------------|------------------|----------|
| Doctors                 | Field of Science | 17       |
| Biologists              | Field of Science | 16       |
| Chemists                | Field of Science | 14       |
| Psychologist            | Field of Science | 12       |
| Teachers                | Field of Science | 9        |
| Pharmacists             | Field of Science | 7        |
| Neurologists            | Field of Science | 5        |
| Physicists              | Field of Science | 5        |
| Nutritionists           | Field of Science | 4        |
| Engineers               | Field of Science | 3        |
| Marine Biologists       | Field of Science | 3        |
| Psychiatrists           | Field of Science | 3        |
| Dentists                | Field of Science | 3        |
| Social Scientists       | Field of Science | 3        |
| Anthropologists         | Field of Science | 2        |
| Astronomers             | Field of Science | 2        |
| Computer Scientists     | Field of Science | 2        |
| CSI/Coroners            | Field of Science | 2        |
| Economists              | Field of Science | 2        |
| Geologists              | Field of Science | 2        |
| Nurses                  | Field of Science | 2        |
| Philosophers            | Field of Science | 2        |
| Physical Therapists     | Field of Science | 2        |
| Veterinarians           | Field of Science | 2        |
| Phlebotomists           | Field of Science | 2        |
| Artists                 | Field of Science | 1        |
| Sociologists            | Field of Science | 1        |
| Agricultural Scientists | Field of Science | 1        |
| Archaeologists          | Field of Science | 1        |
| Behavioral Scientists   | Field of Science | 1        |

|                           |                  |   |
|---------------------------|------------------|---|
| Botanists                 | Field of Science | 1 |
| Cardiovascular Scientists | Field of Science | 1 |
| Clinical Lab Scientists   | Field of Science | 1 |
| Coaches                   | Field of Science | 1 |
| Construction Workers      | Field of Science | 1 |
| Cosmetologists            | Field of Science | 1 |
| Estheticians              | Field of Science | 1 |
| Geneticists               | Field of Science | 1 |
| Graduate Students         | Field of Science | 1 |
| Organismal Biologists     | Field of Science | 1 |
| Supplement Makers         | Field of Science | 1 |
| Massage Therapists        | Field of Science | 1 |
| Meteorologists            | Field of Science | 1 |
| Military Scientists       | Field of Science | 1 |
| Nano Scientists           | Field of Science | 1 |
| NASA Scientists           | Field of Science | 1 |
| Nuclear Scientists        | Field of Science | 1 |
| Pharmacologists           | Field of Science | 1 |
| Quantum Scientists        | Field of Science | 1 |
